# Supplementary material for: Bridged-multi-octahedral cobalt oxide nanocrystals with a Co-terminated surface as an oxygen evolution and reduction electrocatalyst
Source: Royal Society of Chemistry journal article supplement (doi:10.1039/c7ta01013c), 2017-01-01
Supplement: c7ta01013c1.pdf [file c7ta01013c1.pdf]

*Supporting Information for*

# Bridged-multi-octahedral Cobalt Oxide Nanocrystals with Co-terminated Surface as Oxygen Evolution and Reduction Electrocatalyst

Yiliguma,<sup>1</sup> Zhijie Wang,<sup>1</sup> Wenhao Xu,<sup>1</sup> Yuhang Wang,<sup>1</sup> Xiaoqi Cui,<sup>1</sup> Abdullah M. Al-Enizi,<sup>2</sup>  
Yun Tang,<sup>1,\*</sup> Gengfeng Zheng<sup>1,\*</sup>

<sup>1</sup>Laboratory of Advanced Materials, Department of Chemistry, Collaborative Innovation Center  
of Chemistry for Energy Materials, Fudan University, Shanghai 200433, China

<sup>2</sup>Department of Chemistry, College of Science, King Saud University, Riyadh 11451, Saudi  
Arabia

## Supporting Figures

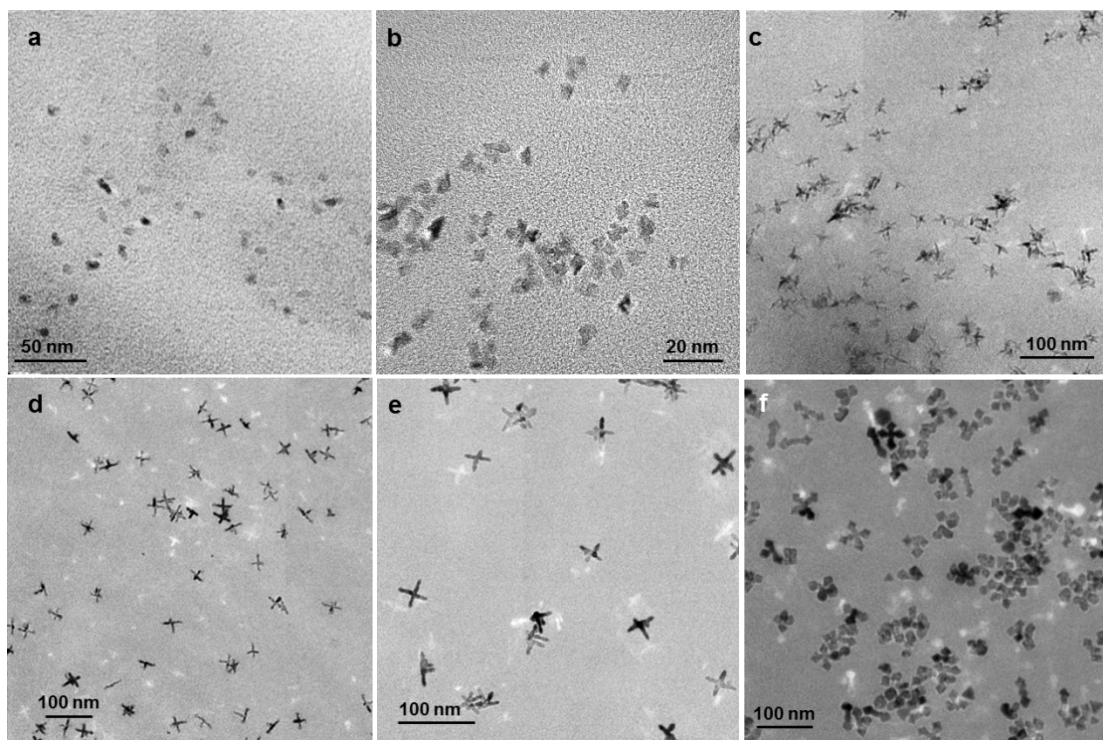

**Figure S1.** TEM images of cobalt oxide NCs obtained from (a) 1 min, (b) 5 min, (c) 15 min, (d) 60 min, (e) 90 min, and (f) 5 h reaction time.

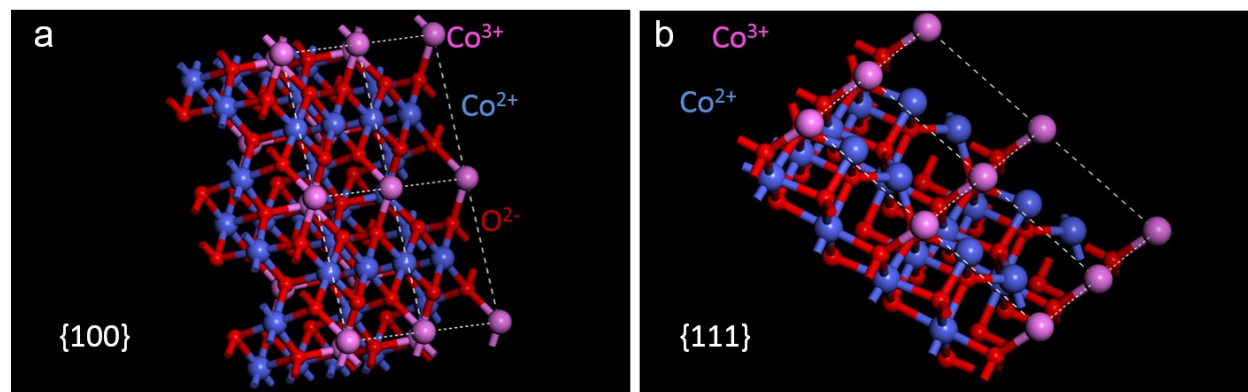

Figure S2. Structural models of (a) the  $\{100\}$  crystal facets of intermediate NCs (cubic spinel  $\text{Co}_3\text{O}_4$ ), and (b) the  $\{111\}$  crystal facet of final NCs (cubic spinel  $\text{Co}_3\text{O}_4$ ).

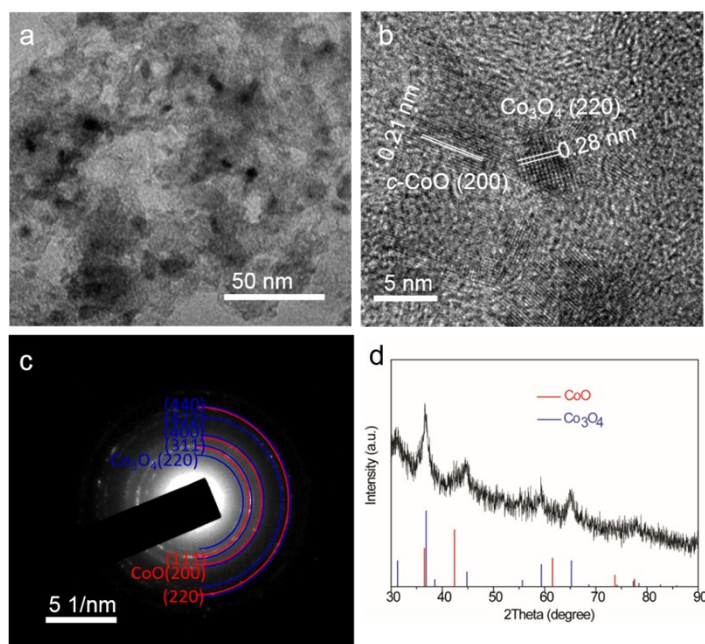

Figure S3. (a) TEM image of as-made hydrothermally synthesized  $\text{CoO}_x$  ( $\text{CoO}_x$ -HT) and inset SAED pattern indicates the cubic crystalline structure (JCPDS No. 43-1004) of the hydrothermally synthesized  $\text{CoO}_x$ . (b) HRTEM image of  $\text{CoO}_x$ -HT.

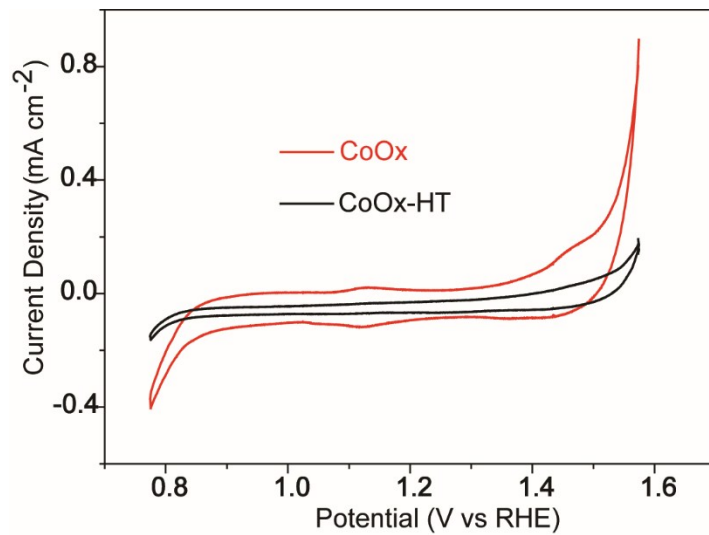

**Figure S4.** CV curves for the CoO<sub>x</sub> NC and CoO<sub>x</sub>-HT.

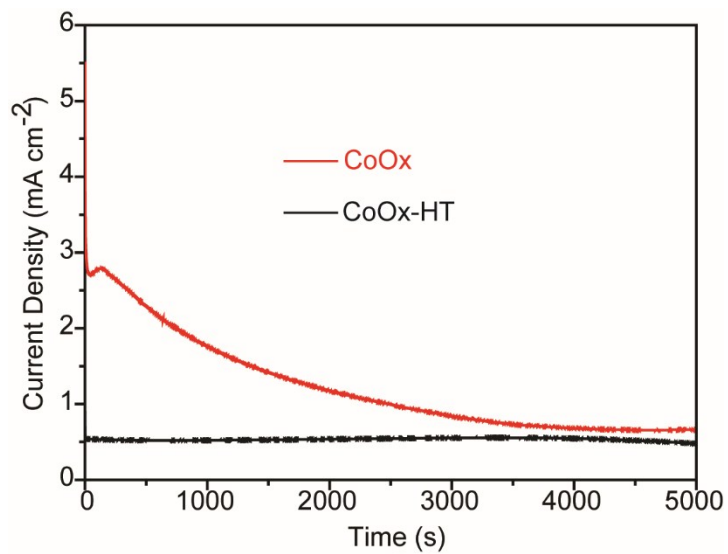

**Figure S5.** OER durability test of the CoO<sub>x</sub> NC and CoO<sub>x</sub>-HT.

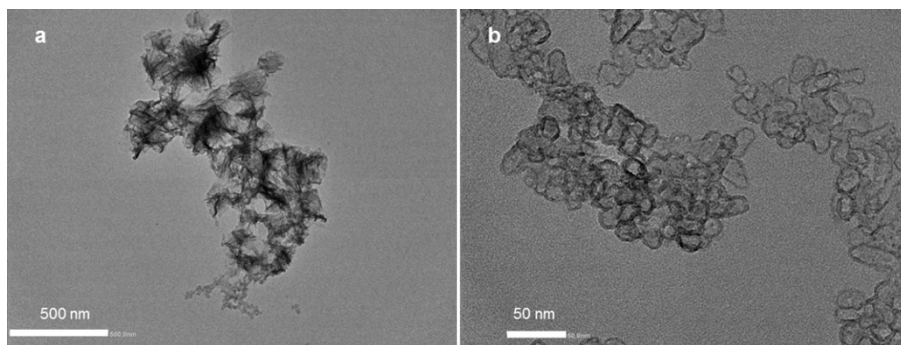

**Figure S6.** (a, b) TEM images of the  $\text{CoO}_x$  NC catalyst after the stability tests, indicating the degradation of  $\text{CoO}_x$  NC catalyst during the catalytic process.

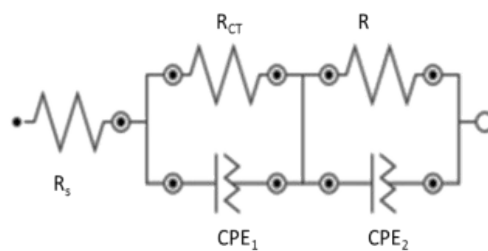

**Figure S7.** The electrical equivalent circuit for the EIS test.

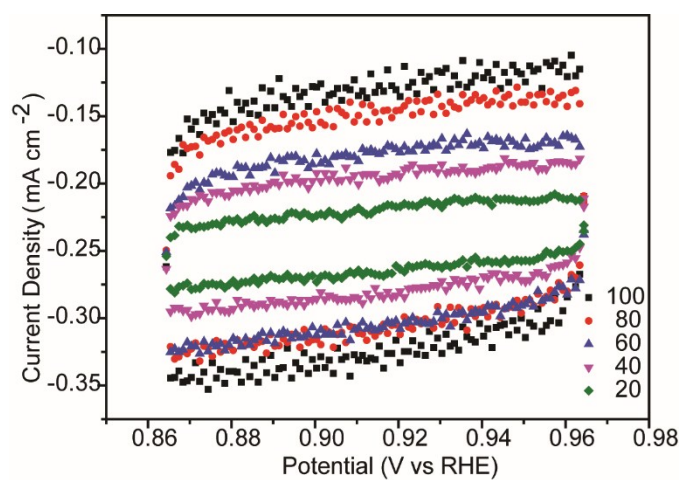

**Figure S8.** CVs scanned with different rates from 20 to 100  $\text{mV s}^{-1}$  in the potential range of near 0.87 – 0.97 V vs RHE for  $\text{CoO}_x$ -HT catalyst.

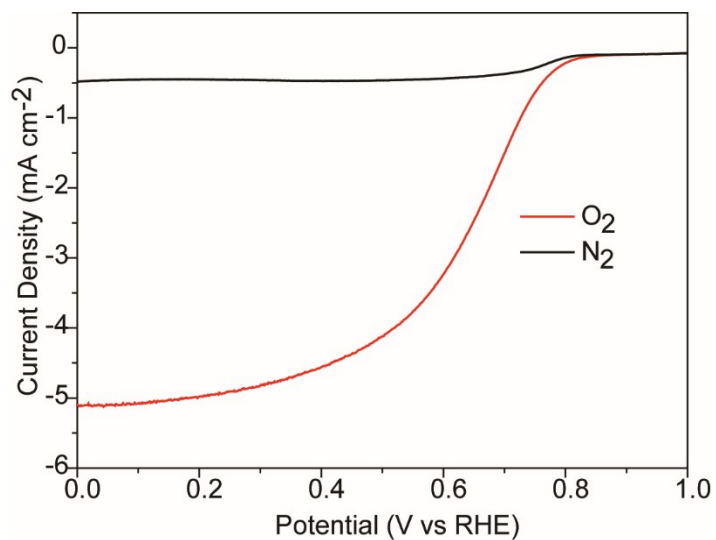

**Figure S9.** LSVs of CoO<sub>x</sub> NC in oxygen and nitrogen saturated 0.1M KOH.

### Supporting Table

**Table S1.** Comparison of the values of the fitted Nyquist plots for each sample.

| Sample               | R <sub>s</sub><br>(Ω) | R <sub>CT</sub><br>(Ω) | R<br>(Ω) | CPE <sub>1</sub><br>(mF cm <sup>-2</sup> ) | CPE <sub>2</sub><br>(mF cm <sup>-2</sup> ) |
|----------------------|-----------------------|------------------------|----------|--------------------------------------------|--------------------------------------------|
| CoO <sub>x</sub> NC  | 5.43                  | <b>0.60</b>            | 47.3     | 4.01                                       | 1.68                                       |
| CoO <sub>x</sub> -HT | 5.24                  | <b>4.37</b>            | 534      | 2.42                                       | 0.32                                       |
